# Supplementary material
Source: Springer Nature journal article supplement (https://www.springermedizin.de/resource/supplementary/12955_2007_371_MOESM1_ESM.pdf/9560256)
Supplement: MOESM1 [file 9560256]

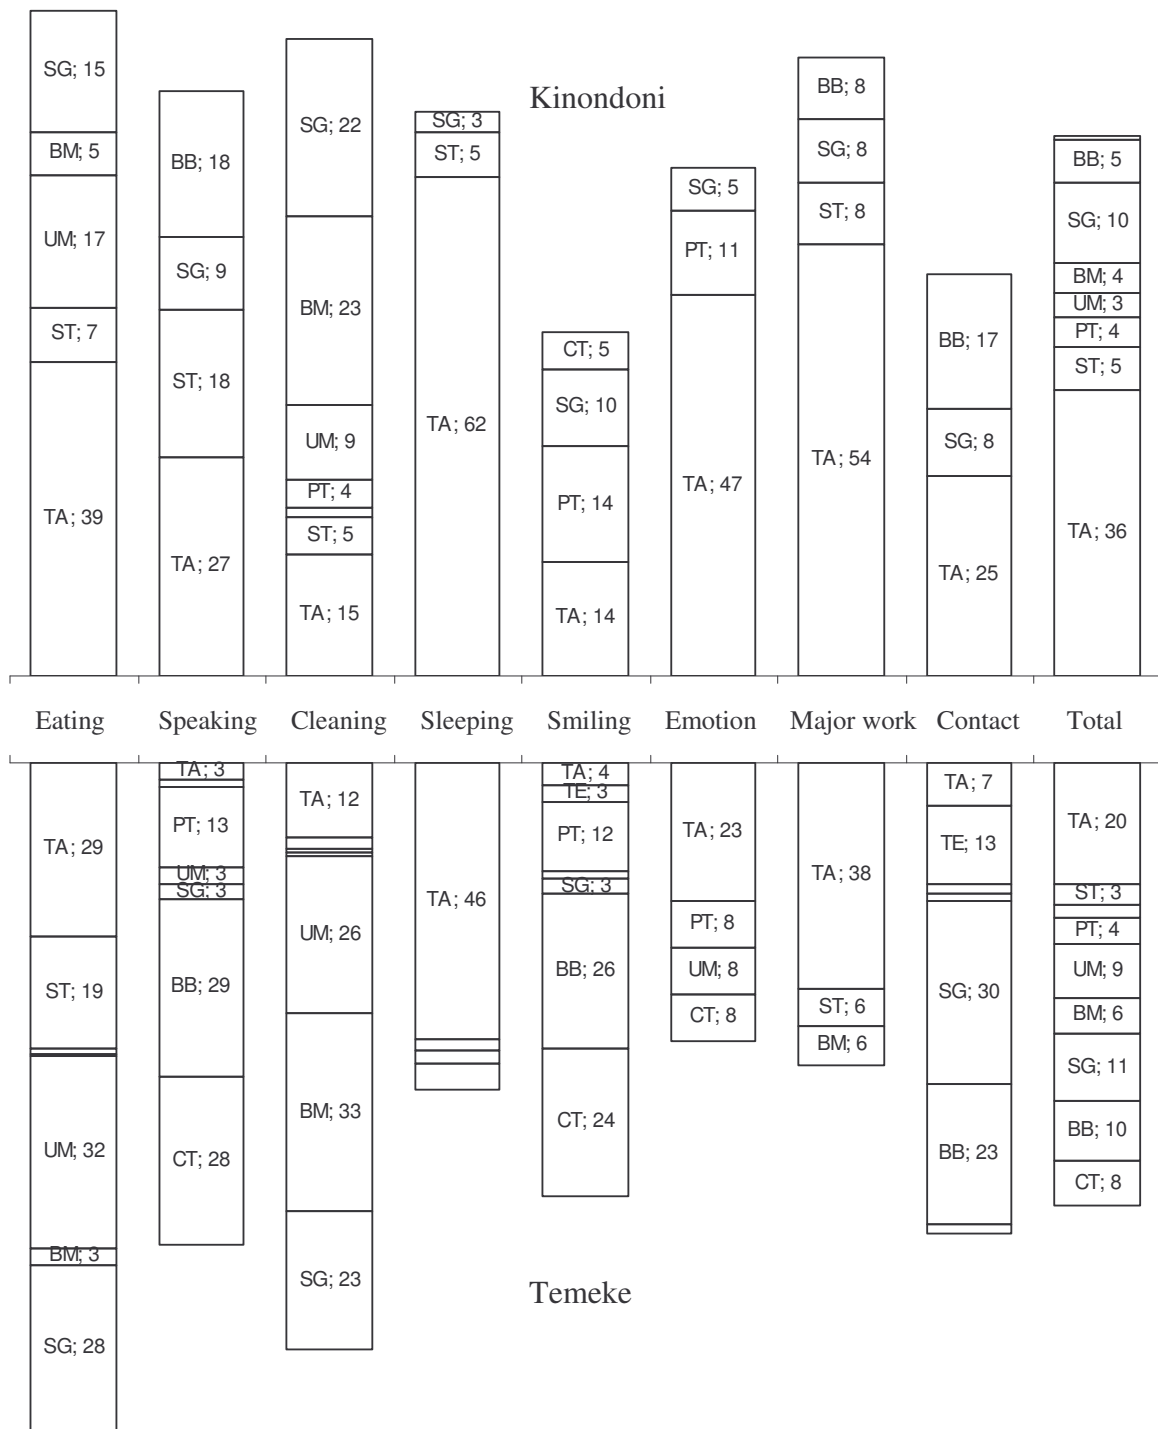

**Abbreviations:**

TA-Toothache; ST-Sensitive teeth; BM-Bleeding in the mouth; SG-Swollen gums; BB-Bad breath; PT-Position of teeth; CT-Colour of teeth; TE-Tooth exfoliation; UM-Ulcer in the mouth

*Note:* Unmarked spaces and causes of impacts not presented in the figure had value <3%
